# Supplementary material for: Dynamic Modulation of Cortical Excitability during Visual Active Sensing
Source: PubMed Central journal article supplement — Cell Rep. Author manuscript; Available in PMC 2019 Jun 28. (PMC6598687; doi:10.1016/j.celrep.2019.05.072), 2019-06-18
Supplement: NIHMS1532293-supplement-1.pdf [file NIHMS1532293-supplement-1.pdf]

**Cell Reports, Volume 27**

**Supplemental Information**

**Dynamic Modulation of Cortical Excitability  
during Visual Active Sensing**

**Annamaria Barczak, Saskia Haegens, Deborah A. Ross, Tammy McGinnis, Peter Lakatos, and Charles E. Schroeder**

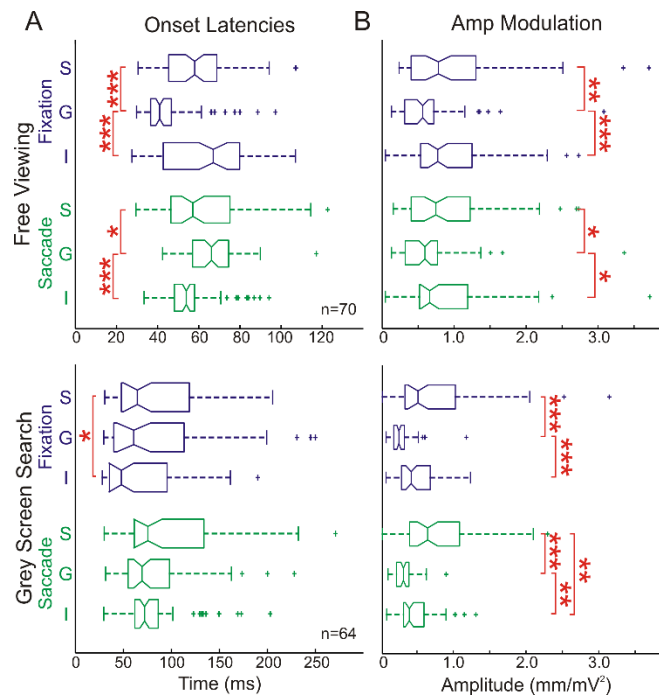

**Figure S1. Eye-movement related onset latencies and depth of modulation, Related to Figure 2.**

(A) Compiled laminar onset latencies across all experiments for fixation (blue) and saccade (green) related activity during free viewing (top) and during GSS (bottom). Boxplots are organized by supragranular (S), granular (G), and infragranular (I) layers. Red brackets indicate a significant difference between groups based on statistical comparison, \* $p < 0.05$ , \*\* $p < 0.01$ , \*\*\* $p < 0.001$  (B) Same organization as in (A) but for compiled depth of modulation values.
